# Supplementary material for: Involvement of JNK and Caspase Activation in Hoiamide A-Induced Neurotoxicity in Neocortical Neurons
Source: Mar Drugs. 2015 Feb 10;13(2):903–19. doi: 10.3390/md13020903 (PMC4344608; doi:10.3390/md13020903)
Supplement: Supplementary File 1 [file marinedrugs-13-00903-s001.pdf]

## Supplementary Information

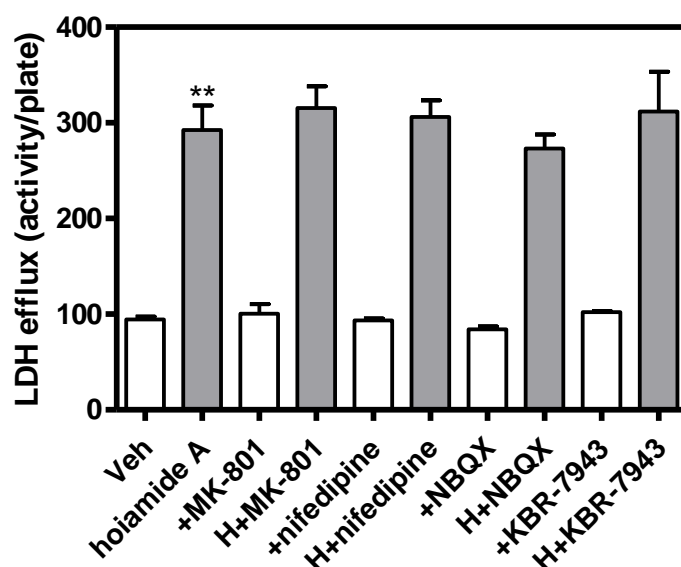

**Figure S1.** Lack of effect of MK-801 (1  $\mu$ M), nifedipine (1  $\mu$ M), NBQX (1  $\mu$ M) and KBR-7943 (3  $\mu$ M) on 30 nM hoiamide A-induced LDH efflux. These data were obtained from two independent cell cultures each performed in triplicate (\*\*  $p < 0.01$ , hoiamide A vs. vehicle).
